# Supplementary material
Source: ML conference proceedings conference paper supplement (https://openreview.net/forum?id=8zJevzvk64)
Supplement: supplementary_material [file attachment]

## A APPENDIX

## A.1 PROOF OF THEOREM 4.2

The key to proving Theorem 4.2 is the use of Girsanov's theorem.

**Lemma 1**(Girsanov's theorem) For  $t \in [0, T]$ , let  $\mathcal{L}_t = \int_0^t b_s dB_s$  where  $B$  is a  $Q$ -Brownian motion. Assume  $\mathbb{E}_Q \int_0^T \|b_s\|^2 ds < \infty$ . Then,  $\mathcal{L}$  is a  $Q$ -martingale in  $L^2(Q)$ . Moreover, if

$$\mathbb{E}_Q \mathcal{E}(\mathcal{L})_T = 1, \text{ where } \mathcal{E}(\mathcal{L})_t := \exp \left( \int_0^t b_s dB_s - \frac{1}{2} \int_0^t \|b_s\|^2 ds \right),$$

then  $\mathcal{E}(\mathcal{L})$  is also a  $Q$ -martingale and the process

$$t \mapsto B_t - \int_0^t b_s ds$$

is a Brownian motion under  $P := \mathcal{E}_T Q$ , the probability distribution with density  $\mathcal{E}(\mathcal{L})_T$  w.r.t.  $Q$ .

In the proof below, for any fixed  $t \in \{2, \dots, H\}$  and  $(s, a) \in \mathcal{S} \times \mathcal{A}$ , let  $p_{\text{data}} = T_t(\cdot | s, a)$ , we denote the path measure of the backward SDE 7 and forward SDE 6 (they share the same solution) to be  $Q_T := Q_T(\cdot | t, s, a)$ . Denote the path measure generated from the conditional likelihood training to be  $P_T := P_T(\cdot | t, s, a, \phi, \theta)$ . Denote  $\widehat{\mathbf{Z}}(\cdot, \cdot, \tilde{\theta}) := \widehat{\mathbf{Z}}$  and  $\mathbf{Z} := \mathbf{Z}(\cdot, \cdot, \tilde{\phi})$ . By Assumption (1)~(6), the following analysis holds for any given  $t = 2, \dots, H$  and  $(s_{t-1}, a_{t-1}) \in \mathcal{S} \times \mathcal{A}$ .

**Theorem 4.2** For any  $t = 2, \dots, H$  and any  $(s_{t-1}, a_{t-1}) \in \mathcal{S} \times \mathcal{A}$ , suppose the diffusion time  $T \geq \max\{1, \frac{1}{\bar{r}^2}\}$ , we have

$$\text{TV}(\widehat{T}_t(\cdot | s, a), T_t(\cdot | s, a)) \lesssim (\epsilon + M^3 L^{3/2} T \sqrt{dh} + LMmh) \sqrt{T}.$$

*Proof.* We start by proving

$$\sum_{k=0}^{N-1} \mathbb{E}_{Q_T} \int_{kh}^{(k+1)h} \left\| \widehat{\mathbf{Z}}(kh, \mathbf{X}_{kh}) - c \nabla_{\mathbf{x}} \log \widehat{\Psi}(r, \mathbf{X}_r) \right\|^2 dr \lesssim (\epsilon^2 + M^6 L^3 dh + M^2 h^2 m^2) T.$$

For  $r \in [kh, (k+1)h]$ , we can decompose

$$\begin{aligned} & \mathbb{E}_{Q_T} \left[ \left\| \widehat{\mathbf{Z}}(kh, \mathbf{X}_{kh}) - c \nabla_{\mathbf{x}} \log \widehat{\Psi}(r, \mathbf{X}_r) \right\|^2 \right] \\ & \lesssim \mathbb{E}_{Q_T} \left[ \left\| \widehat{\mathbf{Z}}(kh, \mathbf{X}_{kh}) - c \nabla_{\mathbf{x}} \log \widehat{\Psi}(kh, \mathbf{X}_{kh}) \right\|^2 \right] \\ & \quad + \mathbb{E}_{Q_T} \left[ \left\| g \nabla_{\mathbf{x}} \log \widehat{\Psi}(kh, \mathbf{X}_{kh}) - g \nabla_{\mathbf{x}} \log \widehat{\Psi}(r, \mathbf{X}_{kh}) \right\|^2 \right] \\ & \quad + \mathbb{E}_{Q_T} \left[ \left\| g \nabla_{\mathbf{x}} \log \widehat{Psi}(r, \mathbf{X}_{kh}) - g \nabla_{\mathbf{x}} \log \widehat{Psi}(r, \mathbf{X}_r) \right\|^2 \right] \\ & \lesssim \epsilon^2 + \mathbb{E}_{Q_T} \left\| g \nabla_{\mathbf{x}} \log \left( \frac{\widehat{\Psi}(kh, \mathbf{X}_{kh})}{\widehat{\Psi}(r, \mathbf{X}_{kh})} \right) \right\|^2 + M^2 L^2 \mathbb{E}_{Q_T} \|\mathbf{X}_{kh} - \mathbf{X}_r\|^2 \end{aligned}$$

Notice that if  $S : \mathbb{R}^d \rightarrow \mathbb{R}^d$  is the mapping  $S(x) = \exp(-(r - kh))x$ , then  $\widehat{\Psi}(T - kh, \cdot) = S(\widehat{\Psi}(T - r, \cdot) * \mathcal{N}(0, 1 - \exp(-2(r - kh))))$ . We can use Lemma 2 with  $\alpha = \exp(r - kh) = 1 + O(h)$  and  $\sigma^2 = 1 - \exp(-2(r - kh)) = O(h)$  and obtain

$$\mathbb{E}_{Q_T} \left\| g \nabla_{\mathbf{x}} \log \left( \frac{\widehat{\Psi}(kh, \mathbf{X}_{kh})}{\widehat{\Psi}(r, \mathbf{X}_{kh})} \right) \right\|^2 \lesssim M^2 (L^2 dh + L^2 h^2 \|\mathbf{X}_{kh}\|^2 + L^2 h^2 \left\| \nabla_{\mathbf{x}} \log \widehat{\Psi}(r, \mathbf{X}_{kh}) \right\|^2).$$

Also we have

$$\begin{aligned} \left\| \nabla_{\mathbf{x}} \widehat{Psi}(r, \mathbf{X}_{kh}) \right\|^2 &\leq \left\| \nabla_{\mathbf{x}} \log \widehat{\Psi}(r, \mathbf{X}_r) \right\|^2 + \left\| \nabla_{\mathbf{x}} \log \widehat{Psi}(r, \mathbf{X}_{kh}) - \nabla_{\mathbf{x}} \log \widehat{\Psi}(r, \mathbf{X}_r) \right\|^2 \\ &\leq \left\| \nabla_{\mathbf{x}} \log \widehat{\Psi}(r, \mathbf{X}_r) \right\|^2 + L^2 \|\mathbf{X}_{kh} - \mathbf{X}_r\|^2. \end{aligned}$$

So

$$\begin{aligned} &\mathbb{E}_{Q_T} \left[ \left\| \widehat{\mathbf{Z}}(kh, \mathbf{X}_{kh}) - c \nabla_{\mathbf{x}} \log \widehat{\Psi}(r, \mathbf{X}_r) \right\|^2 \right] \\ &\lesssim \epsilon^2 + M^2(L^2 dh + L^2 h^2 \mathbb{E}_{Q_T} \|\mathbf{X}_{kh}\|^2 + L^2 h^2 \mathbb{E}_{Q_T} \left\| \nabla_{\mathbf{x}} \log \widehat{\Psi}(T-r, \mathbf{X}_r) \right\|^2 + L^2 \mathbb{E}_{Q_T} \|\mathbf{X}_{kh} - \mathbf{X}_r\|^2). \end{aligned}$$

Using  $L$ -smoothness of  $\nabla_{\mathbf{x}} \log \widehat{\Psi}$  and  $\nabla_{\mathbf{x}} \log \Psi$ , by (Vempala & Wibisono (2019), Lemma 9) and (Chen et al. (2023a), Lemma 10), we have

$$\mathbb{E} \left\| \nabla_{\mathbf{x}} \log \widehat{\Psi}(r, X_r) \right\|^2 \leq Ld,$$

and

$$\mathbb{E} \|\nabla_{\mathbf{x}} \log \Psi(r, X_r)\|^2 \leq Ld.$$

On the other hand, for  $0 \leq s < r$ , by the forward process 6, we have

$$\begin{aligned} \mathbb{E}_{Q_T} \|\mathbf{X}_r - \mathbf{X}_s\|^2 &= \mathbb{E}_{Q_T} \left[ \left\| \int_s^r (f + c^2 \nabla_{\mathbf{x}} \log \Psi(r, \mathbf{X}_r)) dr + c(B_r - B_s) \right\|^2 \right] \\ &\lesssim (r-s) \int_s^r \mathbb{E} \|f + c^2 \nabla_{\mathbf{x}} \log \Psi(r, \mathbf{X}_r)\|^2 dr + M(r-s)d \\ &\lesssim (r-s)^2 M^2 + (r-s)^2 M^4 Ld + M(r-s)d \end{aligned}$$

As a result, we get

$$\begin{aligned} \mathbb{E} \|\mathbf{X}_{kh}\|^2 &\leq \mathbb{E} \|\mathbf{X}_0\|^2 + T^2 M^2 + T^2 M^4 Ld + MTd \\ &\leq m^2 + T^2 M^2 + T^2 M^4 Ld + MTd \end{aligned}$$

and

$$\mathbb{E} \|\mathbf{X}_{kh} - \mathbf{X}_r\|^2 \leq h^2 M^2 + h^2 M^4 Ld + Mhd.$$

Combining the results above, we get that

$$\begin{aligned} &\mathbb{E}_{Q_T} \left[ \left\| \widehat{\mathbf{Z}}(kh, \mathbf{X}_{kh}) - c \nabla_{\mathbf{x}} \log \widehat{\Psi}(r, \mathbf{X}_r) \right\|^2 \right] \\ &\lesssim \epsilon^2 + M^2 [L^2 dh + L^2 h^2 (m^2 + T^2 M^2 + T^2 M^4 Ld + MTd) + L^2 h^2 Ld + L^2 (h^2 M^2 + h^2 M^4 Ld + Mhd)] \\ &\lesssim \epsilon^2 + M^6 L^3 T^2 dh + M^2 L^2 h^2 m^2. \end{aligned}$$

(Suppose  $T \geq 1$  and  $h \lesssim \frac{1}{L}$ ) So we have

$$\sum_{k=0}^{N-1} \mathbb{E}_{Q_T} \int_{kh}^{(k+1)h} \left\| \widehat{\mathbf{Z}}(kh, \mathbf{X}_{kh}) - c \nabla_{\mathbf{x}} \log \widehat{\Psi}(r, \mathbf{X}_r) \right\|^2 dr \lesssim (\epsilon^2 + M^6 L^3 T^2 dh + M^2 L^2 h^2 m^2) T.$$

Now we apply an approximation argument to use Girsanov's theorem and prove Theorem 4.2.

For  $r \in [0, T]$ , let  $\mathcal{L}_r = \int_0^r b_s dB_s$  where  $B$  is a  $Q_T$ -Brownian motion. For  $r \in [kh, (k+1)h]$ , define

$$b_r = -c \nabla_{\mathbf{x}} \log \widehat{\Psi}(r, \mathbf{X}_r) + \widehat{\mathbf{Z}}(kh, \mathbf{X}_{kh}).$$

From above,

$$\mathbb{E}_{Q_T} \int_0^T \|b_s\|^2 ds \lesssim (\epsilon^2 + M^6 L^3 T^2 dh + M^2 L^2 h^2 m^2) T < \infty,$$

using (Le Gall (2016), Proposition 5.11),  $(\mathcal{E}(\mathcal{L})_r)_{r \in [0, T]}$  (see the definition in Lemma 1) is a local martingale (see Definition 1). Therefore, there exists a non-decreasing sequence of stopping

time  $T_n \uparrow T$  such that  $(\mathcal{E}(\mathcal{L})_{r \wedge T_n})_{r \in [0, T]}$  is a martingale. Notice that  $\mathcal{E}(\mathcal{L})_{r \wedge T_n} = \mathcal{E}(\mathcal{L}_r^n)$  where  $\mathcal{L}_r^n = \mathcal{L}_{r \wedge T_n}$ . Since  $\mathcal{E}(\mathcal{L}_r^n)_{r \in [0, T]}$  is a martingale, we have

$$\mathbb{E}_{Q_T} \mathcal{E}(\mathcal{L}^n)_T = \mathbb{E}_{Q_T} \mathcal{E}(\mathcal{L}^n)_0 = 1,$$

so that  $\mathbb{E}_{Q_T} \mathcal{E}(\mathcal{L})_{T_n} = 1$ .

Apply Girsanov's theorem to  $\mathcal{L}_r^n = \int_0^r b_s \mathbf{1}_{[0, T_n]}(s) dB_s$  where  $B$  is a  $Q_T$ -Brownian motion and get that under  $P^n := \mathcal{E}(\mathcal{L})_T Q_T$ , there exists a Brownian motion  $\beta^n$  such that for  $r \in [0, T]$ ,

$$dB_r = \left[ -c \nabla_{\mathbf{x}} \log \widehat{\Psi}(r, \mathbf{X}_r) + \widehat{\mathbf{Z}}(kh, \mathbf{X}_{kh}) \right] \mathbf{1}_{[0, T_n]}(r) dr + d\beta_r^n.$$

By the backward SDE 7, under  $Q_T$  we have

$$d\mathbf{X}_r = -[f - c^2 \nabla_{\mathbf{x}} \log \widehat{\Psi}(r, \mathbf{X}_r)] dr + c dB_r, \quad \mathbf{X}_0 \sim p_{\text{prior}}.$$

The equation still holds  $P^n$ -a.s. since  $P^n \ll Q_T$ . Combining the two equations above then we obtain that  $P^n$ -a.s.,

$$d\mathbf{X}_r = \left[ -f + c \widehat{\mathbf{Z}}(kh, \mathbf{X}_{kh}) \right] \mathbf{1}_{[0, T_n]}(r) dr + \left[ -f + c^2 \nabla_{\mathbf{x}} \log \widehat{\Psi}(T - r, \mathbf{X}_r) \right] \mathbf{1}_{[T_n, T]}(r) dr + c d\beta_r^n, \quad \mathbf{X}_0 \sim p_{\text{prior}}.$$

i.e. path measure  $P^n$  is the solution to the above SDE. So we have

$$\begin{aligned} \text{KL}(Q_T | P^n) &= \mathbb{E}_{Q_T} \log \mathcal{E}(\mathcal{L})_{T_n}^{-1} = \mathbb{E}_{Q_T} [-\mathcal{L}_{T_n} + \frac{1}{2} \int_0^{T_n} \|b_s\|^2 ds] = \mathbb{E}_{Q_T} \frac{1}{2} \int_0^{T_n} \|b_s\|^2 ds \\ &\leq \mathbb{E}_{Q_T} \frac{1}{2} \int_0^T \|b_s\|^2 ds \lesssim (\epsilon^2 + M^6 L^3 T^2 dh + M^2 L^2 h^2 m^2) T \end{aligned}$$

where we used that  $\mathbb{E}_{Q_T} \mathcal{L}_{T_n} = 0$  because  $\mathcal{L}$  is a  $Q_T$ -martingale and  $T_n$  is a bounded stopping time. (Le Gall (2016), Corollary 3.23)

Consider a coupling of  $(P^n)_{n \in \mathbb{N}}$ ,  $P_T$ : a sequence of stochastic process  $(\mathbf{X}^n)_{n \in \mathbb{N}}$  over the same probability space, a stochastic process  $\mathbf{X}$  and a single Brownian motion  $W$  over the same space s.t.

$$d\mathbf{X}_r^n = \left[ -f + c \widehat{\mathbf{Z}}(kh, \mathbf{X}_{kh}^n) \right] \mathbf{1}_{[0, T_n]}(r) dr + \left[ -f + c^2 \nabla_{\mathbf{x}} \log \widehat{\Psi}(T - r, \mathbf{X}_r^n) \right] \mathbf{1}_{[T_n, T]}(r) dr + c dW_r,$$

$$d\mathbf{X}_r = \left[ -f + c \widehat{\mathbf{Z}}(kh, \mathbf{X}_{kh}) \right] dr + c dW_r,$$

$$\mathbf{X}_0 = \mathbf{X}_0^n \sim p_{\text{prior}}.$$

By definition of  $P^n$  and  $P_T$ , the distribution of  $\mathbf{X}^n$  ( $\mathbf{X}$ ) is  $P^n$  ( $P_T$ ).

Let  $\delta > 0$  and consider the map  $\pi_\delta : \mathcal{C}([0, T]; \mathbb{R}^d) \rightarrow \mathcal{C}([0, T]; \mathbb{R}^d)$  defined by

$$\pi_\delta(\omega)(r) := \omega(r \wedge (T - \delta)).$$

Notice that  $\mathbf{X}_r^n = \mathbf{X}_r$  for every  $r \in [0, T_n]$ , using Lemma 3, we have  $\pi_\delta(\mathbf{X}^n) \rightarrow \pi_\delta(\mathbf{X})$  a.s., uniformly over  $[0, T]$ . Therefore,  $\pi_{\delta \#} P^n \rightarrow \pi_{\delta \#} P_T$  weakly. Using the lower semicontinuity of the KL divergence and the data-processing inequality (Amb (2005), Lemma 9.4.3 and Lemma 9.4.5), we get

$$\begin{aligned} \text{KL}((\pi_\delta)_{\#} Q_T | (\pi_\delta)_{\#} P_T) &\leq \liminf_{n \rightarrow \infty} \text{KL}((\pi_\delta)_{\#} Q_T | (\pi_\delta)_{\#} P^n) \\ &\leq \liminf_{n \rightarrow \infty} \text{KL}(Q_T | P^n) \\ &\lesssim (\epsilon^2 + M^6 L^3 T^2 dh + M^2 L^2 h^2 m^2) T. \end{aligned}$$

Finally, using Lemma 4,  $\pi_\delta(\omega) \rightarrow \omega$  as  $\delta \rightarrow 0$  uniformly over  $[0, T]$ . Therefore, using (Amb (2005), Corollary 9.4.6),  $\text{KL}((\pi_\delta)_{\#} Q_T | (\pi_\delta)_{\#} P_T) \rightarrow \text{KL}(Q_T | P_T)$  as  $\delta \rightarrow 0$ . Since the marginal distribution at  $T = 0$  of  $Q_T$  is  $T_t(\cdot | s, a)$  and the marginal distribution at  $T = 0$  of  $P_T$  is  $\widehat{T}_t(\cdot | s, a)$ , by data processing inequality we ultimately have

$$\text{KL}(T_t(\cdot | s, a) | \widehat{T}_t(\cdot | s, a)) \lesssim (\epsilon^2 + M^6 L^3 T^2 dh + M^2 L^2 h^2 m^2) T.$$

We conclude the proof using Pinsker's inequality ( $\text{TV}^2 \leq \text{KL}$ ).  $\square$

## A.2 PROOF OF THEOREM 4.1

In this section, we give the proof of Theorem 4.1, which is our main theorem.

**Theorem 4.1** Under Assumptions (1)-(6), let  $\widehat{V}^\pi$  be the output of CDSB estimator, and suppose that the step size  $h := \frac{T}{N}$  satisfies  $h \lesssim \frac{1}{L}$ , where  $L \geq 1$ . Suppose the diffusion time  $T \geq \max\{1, \frac{1}{\tau^2}\}$ , then it holds that

$$|\widehat{V}^\pi - V^\pi| \lesssim R_{\max} \tau^2 H^2 (\epsilon + M^3 L^{3/2} T \sqrt{dh} + LMmh) \sqrt{T}. \quad (12)$$

*Proof.* We have

$$V^\pi = \sum_{t=1}^H \int_{\mathcal{A}} \int_{\mathcal{S}^t} R_t(s_t, a_t) \pi(a_t | s_t) P_t^\pi(s_t | s_{t-1}) \cdots \widehat{P}_2^\pi(s_2 | s_1) d_0(s_1) ds_1 \cdots ds_t da_t,$$

and

$$\widehat{V}^\pi = \sum_{t=1}^H \int_{\mathcal{A}} \int_{\mathcal{S}^t} \widehat{R}_t(s_t, a_t) \pi(a_t | s_t) \widehat{P}_t^\pi(s_t | s_{t-1}) \cdots \widehat{P}_2^\pi(s_2 | s_1) d_0(s_1) ds_1 \cdots ds_t da_t.$$

By Theorem 4.2, assumption (6) and the definition of total-variation norm, for all  $s \in \mathcal{S}$  and all  $t \in \{2, \dots, T\}$ , we have

$$\begin{aligned} \int_{\mathcal{S}} |P_t^\pi(s' | s) - \widehat{P}_t^\pi(s' | s)| ds' &= \int_{\mathcal{S}} \left| \int_{\mathcal{A}} \pi(a | s) (T_t(s' | s, a) - \widehat{T}_t(s' | s, a)) da \right| ds \\ &\lesssim \tau (\epsilon + M^3 L^{3/2} T \sqrt{dh} + LMmh) \sqrt{T} =: \delta_0, \end{aligned}$$

$$\int_{\mathcal{A}} |\widehat{R}_t(s, a) - R_t(s, a)| da \leq \epsilon \lesssim \delta_0,$$

since  $T \geq \max\{1, \frac{1}{\tau^2}\}$ .

So

$$\begin{aligned} &|\widehat{V}^\pi - V^\pi| \\ &\leq \tau \sum_{t=1}^H \left| \int_{\mathcal{A}} \int_{\mathcal{S}^t} \widehat{R}_t(s_t, a_t) \widehat{P}_t^\pi(s_t | s_{t-1}) \cdots \widehat{P}_2^\pi(s_2 | s_1) d_0(s_1) ds_1 \cdots ds_t da_t - \right. \\ &\quad \left. \int_{\mathcal{A}} \int_{\mathcal{S}^t} R_t(s_t, a_t) P_t^\pi(s_t | s_{t-1}) \cdots P_2^\pi(s_2 | s_1) d_0(s_1) ds_1 \cdots ds_t da_t \right| \\ &\leq \tau \sum_{t=1}^H \int_{\mathcal{A}} \int_{\mathcal{S}^t} \left| \widehat{R}_t(s_t, a_t) \widehat{P}_t^\pi(s_t | s_{t-1}) \cdots \widehat{P}_2^\pi(s_2 | s_1) d_0(s_1) - R_t(s_t, a_t) P_t^\pi(s_t | s_{t-1}) \cdots P_2^\pi(s_2 | s_1) d_0(s_1) \right| ds_1 \cdots ds_t da_t \\ &\leq \tau \sum_{t=1}^H \int_{\mathcal{A}} \int_{\mathcal{S}^t} \left( \left| \left( \widehat{R}_t(s_t, a_t) - R_t(s_t, a_t) \right) \widehat{P}_t^\pi(s_t | s_{t-1}) \cdots \widehat{P}_2^\pi(s_2 | s_1) d_0(s_1) \right| \right. \\ &\quad \left. + \left| R_t(s_t, a_t) \left( \widehat{P}_t^\pi(s_t | s_{t-1}) \cdots \widehat{P}_2^\pi(s_2 | s_1) - P_t^\pi(s_t | s_{t-1}) \cdots P_2^\pi(s_2 | s_1) \right) d_0(s_1) \right| \right) ds_1 \cdots ds_t da_t \\ &\quad \dots \\ &\leq \tau \sum_{t=1}^H \left( \int_{\mathcal{A}} \int_{\mathcal{S}^t} \left| \widehat{R}_t(s_t, a_t) - R_t(s_t, a_t) \right| |P_t^\pi(s_t | s_{t-1})| |P_{t-1}^\pi(s_{t-1} | s_{t-2})| \cdots |P_2^\pi(s_2 | s_1) d_0(s_1)| ds_1 \cdots ds_t da_t \right. \\ &\quad \left. + \cdots + \int_{\mathcal{A}} \int_{\mathcal{S}^t} \left| \widehat{R}_t(s_t, a_t) - R_t(s_t, a_t) \right| \left| \widehat{P}_t^\pi(s_t | s_{t-1}) - P_t^\pi(s_t | s_{t-1}) \right| \cdots \left| \widehat{P}_2^\pi(s_2 | s_1) - P_2^\pi(s_2 | s_1) \right| d_0(s_1) ds_1 \cdots ds_t da_t \right) \end{aligned}$$

The summation above contains  $2^{t-1} - 1$  items, each term  $|\cdot|$  in the integration of each item is either  $|\widehat{P}_j^\pi(s_j | s_{j-1}) - P_j^\pi(s_j | s_{j-1})|$  ( $|\widehat{R}_t(s_t, a_t) - R_t(s_t, a_t)|$ ) or  $|P_j^\pi(s_j | s_{j-1})|$  ( $|R_t(s_t, a_t)|$ ) for  $j = 2, \dots, t$ , but not all  $|P_t^\pi(s_t | s_{t-1})|$ . Relax all the  $|\widehat{P}_j^\pi(s_j | s_{j-1}) - P_j^\pi(s_j | s_{j-1})|$  and  $|\widehat{R}_t(s_t, a_t) - R_t(s_t, a_t)|$ .

$R_t(s_t, a_t)$  to their uniform upper bound (with respect to  $s_{j-1}$  and  $s_t$ )  $\delta_0$ . Since  $P_j^\pi$  are non-negative for  $t = 1, \dots, t-1$ , the terms of each item in the summation are then relaxed to

$$\delta_0^{t-1-k} \int_{\mathcal{A}} \int_{\mathcal{S} \times \dots \times \mathcal{S}} R_t(s_t, a_t) P_{j_k}^\pi(s_{j_k} | s_{j_k-1}) \dots P_{j_1}^\pi(s_{j_1} | s_{j_1-1}) d_0(s_1) ds_t \dots ds_1 da_t,$$

or

$$\delta_0^{t-k} \int_{\mathcal{S} \times \dots \times \mathcal{S}} R_t(s_t, a_t) P_{j_k}^\pi(s_{j_k} | s_{j_k-1}) \dots P_{j_1}^\pi(s_{j_1} | s_{j_1-1}) d_0(s_1) ds_t \dots ds_1,$$

where  $1 \leq k \leq t-1$ ,  $j_1 < \dots < j_k$  and  $\{j_1, \dots, j_k\} \in \{2, \dots, t\}$ . By the definition of  $P_j^\pi$ , it's easy to verify that

$$\int_{\mathcal{S}^t} P_{j_k}^\pi(s_{j_k} | s_{j_k-1}) \dots P_{j_1}^\pi(s_{j_1} | s_{j_1-1}) d_0(s_1) ds_t \dots ds_1 = 1$$

and

$$\int_{\mathcal{A}} \int_{\mathcal{S}^t} R_t(s_t, a_t) P_{j_k}^\pi(s_{j_k} | s_{j_k-1}) \dots P_{j_1}^\pi(s_{j_1} | s_{j_1-1}) d_0(s_1) ds_t \dots ds_1 da_t \leq R_{\max}$$

for any  $1 \leq k \leq t-1$ ,  $j_1 < \dots < j_k$  and  $\{j_1, \dots, j_k\} \in \{2, \dots, t\}$ . So that the summation

$$\begin{aligned} & \int_{\mathcal{A}} \int_{\mathcal{S}^t} \left| \widehat{R}_t(s_t, a_t) - R_t(s_t, a_t) \right| \left| P_t^\pi(s_t | s_{t-1}) \right| \left| P_{t-1}^\pi(s_{t-1} | s_{t-2}) \right| \dots \left| P_2^\pi(s_2 | s_1) \right| d_0(s_1) ds_1 \dots ds_t da_t \\ & + \dots + \int_{\mathcal{A}} \int_{\mathcal{S}^t} \left| \widehat{R}_t(s_t, a_t) - R_t(s_t, a_t) \right| \left| \widehat{P}_t^\pi(s_t | s_{t-1}) - P_t^\pi(s_t | s_{t-1}) \right| \dots \left| \widehat{P}_2^\pi(s_2 | s_1) - P_2^\pi(s_2 | s_1) \right| d_0(s_1) ds_1 \dots ds_t da_t \\ & \leq R_{\max} (\delta_0^t + t\delta_0^{t-1} + \dots + t\delta_0) \\ & = R_{\max} ((\delta_0 + 1)^t - 1) \\ & \leq R_{\max} ((\delta_0 + 1)^H - 1). \end{aligned}$$

Noting that  $\delta_0 = \tau(\epsilon + M^3 L^{3/2} T \sqrt{dh} + LMmh)\sqrt{T}$ , so for  $\epsilon$  and  $h$  that is sufficiently small, there exists a universal constant  $\eta$ , such that

$$\left| \widehat{V}^\pi - V^\pi \right| \leq H\tau H R_{\max} \eta \delta_0 \lesssim R_{\max} \tau^2 H^2 (\epsilon + M^3 L^{3/2} T \sqrt{dh} + LMmh)\sqrt{T},$$

which finishes the proof of Theorem 4.1.  $\square$

### A.3 AUXILIARY LEMMAS

In this section, we presents the definitions and auxiliary lemmas which are used to prove Theorem 4.2.

**Definition 1** A local martingale  $(L_t)_{t \in [0, T]}$  is a stochastic process such that there exists a sequence of non-decreasing stopping times  $T_n \rightarrow T$  such that  $L^n = (L_{t \wedge T_n})_{t \in [0, T]}$  is a martingale.

**Lemma 2** (Chen et al. (2023a), Lemma 16) Let  $0 < \zeta < 1$ . Suppose that  $\mathbf{M}_0, \mathbf{M}_1 \in \mathbb{R}^{2d \times 2d}$  are two matrices, where  $\mathbf{M}_1$  is symmetric. Also, assume that  $\|\mathbf{M}_0 - \mathbf{I}_{2d}\|_{op} \leq \zeta$ , so that  $\mathbf{M}_0$  is invertible. Let  $\mathbf{q} = \exp(-\mathbf{H})$  be a probability density on  $\mathbb{R}^{2d}$  such that  $\nabla \mathbf{H}$  is  $L$ -lipschitz with  $L \leq \frac{1}{4\|\mathbf{M}_1\|_{op}}$ , it holds that

$$\left\| \nabla \log \frac{(\mathbf{M}_0)^\# \mathbf{q} * \mathcal{N}(0, \mathbf{M}_1)}{\mathbf{q}}(\theta) \right\| \lesssim L \sqrt{\|\mathbf{M}_1\|_{op} d} + L\zeta \|\theta\| + (\zeta + L \|\mathbf{M}_1\|_{op}) \|\nabla \mathbf{H}(\theta)\|.$$

The following lemmas are very straightforward, so the proof is omitted.

**Lemma 3** Consider  $f_n, f : [0, T] \rightarrow \mathbb{R}^d$  s.t. there exists an increasing sequence  $(T_n)_{n \in \mathbb{N}} \subseteq [0, T]$  satisfying  $T_n \rightarrow T$  as  $n \rightarrow \infty$  and  $f_n(t) = f(t)$  for every  $t \leq T_n$ . Then for every  $\epsilon > 0$ ,  $f_n \rightarrow f$  uniformly over  $[0, T - \epsilon]$ . In particular,  $f_n(\cdot \wedge T - \epsilon) \rightarrow f(\cdot \wedge T - \epsilon)$  uniformly over  $[0, T]$ .

**Lemma 4** Consider  $f : [0, T] \rightarrow \mathbb{R}^d$  continuous, and  $f_\epsilon : [0, T] \rightarrow \mathbb{R}^d$  s.t.  $f_\epsilon(r) = f(r \wedge (T - \epsilon))$  for  $\epsilon > 0$ . Then  $f_\epsilon \rightarrow f$  uniformly over  $[0, T]$  as  $\epsilon \rightarrow 0$ .

#### A.4 EXPERIMENTS

We have made our code publicly available<sup>1</sup>.

---

<sup>1</sup>[https://anonymous.4open.science/r/bridge\\_OPE-302D/](https://anonymous.4open.science/r/bridge_OPE-302D/)
